# Supplementary material for: Antimicrobial Resistance in Rapidly Growing Nontuberculous Mycobacteria among Domestic and Wild Animals Emphasizing the Zoonotic Potential
Source: MDPI journal article supplement (doi:10.3390/microorganisms11102520), 2023-10-09
Supplement: s1 [file s1]

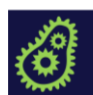

## Article

# Antimicrobial Resistance in Rapidly Growing Nontuberculous Mycobacteria among Domestic and Wild Animals Emphasizing the Zoonotic Potential

Irena Reil <sup>1,†</sup>, Silvio Špičić <sup>1,†</sup>, Ljubo Barbić <sup>2</sup>, Sanja Duvnjak <sup>1,\*</sup>, Gordan Kompes <sup>1,\*</sup>, Miroslav Benić <sup>1</sup>, Dora Stojević <sup>1</sup>, Željko Cvetnić <sup>1</sup>, Jurica Arapović <sup>3,4</sup> and Maja Zdellar-Tuk <sup>1</sup>

<sup>1</sup> Croatian Veterinary Institute, 10000 Zagreb, Croatia; irena.reil@gmail.com (I.R.); spicic@veinst.hr (S.Š.); benic@veinst.hr (M.B.); dstojevic@gmail.com (D.S.); cvetnic@veinst.hr (Ž.C.); zdellar-tuk@veinst.hr (M.Z.-T.);

<sup>2</sup> The Faculty of Veterinary Medicine, University of Zagreb, 10000 Zagreb, Croatia; ljbarbic@gmail.com

<sup>3</sup> Department of Infectious Diseases, University Clinical Hospital Mostar, 88000 Mostar, Bosnia and Herzegovina; jurica.arapovic@mef.sum.ba

<sup>4</sup> School of Medicine, University of Mostar, 88000 Mostar, Bosnia and Herzegovina

\* Correspondence: marjanovic@veinst.hr (S.D.); kompes@veinst.hr (G.K.);  
Tel.: +385-16123635 (S.D.); +385-16123657 (G.K.)

<sup>†</sup> These authors contributed equally to this work.

**Table S1.** The results of determining the antimicrobial susceptibility of rapidly-growing NTM isolates.

| No. in list | Animal species | NTM species          | Interpretation of susceptibility test and MIC (µg/ml) |              |           |            |            |               |                                                       |               |             |            |            |               |     |            |                        |
|-------------|----------------|----------------------|-------------------------------------------------------|--------------|-----------|------------|------------|---------------|-------------------------------------------------------|---------------|-------------|------------|------------|---------------|-----|------------|------------------------|
|             |                |                      | AMI                                                   | AUG2         | FEP       | FOX        | AXO        | CIP           | CLA<br>(5 <sup>th</sup> day/<br>14 <sup>th</sup> day) | DOX           | IMI         | LZD        | MIN        | MXF           | TGC | TOB        | SXT                    |
| 1           | wild boar      | <i>M. arupense</i>   | ≤ 1<br>(S)                                            | 16/8<br>(I)  | 16<br>(I) | ≤ 4<br>(S) | 32<br>(I)  | ≤ 0,12<br>(S) | 0,12/<br>0,12<br>(S/S)                                | ≤ 0,12<br>(S) | 8<br>(I)    | ≤ 1<br>(S) | ≤ 1<br>(S) | ≤ 0,25<br>(S) | 0,3 | ≤ 1<br>(S) | ≤ 0,25/<br>4,75<br>(S) |
| 2           | wild boar      | <i>M. arupense</i>   | ≤ 1<br>(S)                                            | 8/4<br>(S)   | 8<br>(S)  | ≤ 4<br>(S) | 32<br>(I)  | ≤ 0,12<br>(S) | ≤ 0,06/<br>≤ 0,06<br>(S/S)                            | ≤ 0,12<br>(S) | 16<br>(I)   | ≤ 1<br>(S) | ≤ 1<br>(S) | ≤ 0,25<br>(S) | 0,1 | ≤ 1<br>(S) | ≤ 0,25/<br>4,75<br>(S) |
| 3           | cattle         | <i>M. chitae</i>     | ≤ 1<br>(S)                                            | 8/4<br>(S)   | 4<br>(S)  | ≤ 4<br>(S) | ≤ 4<br>(S) | ≤ 0,12<br>(S) | ≤ 0,06/<br>0,5<br>(S/S)                               | ≤ 0,12<br>(S) | ≤ 2<br>(S)  | ≤ 1<br>(S) | ≤ 1<br>(S) | ≤ 0,25<br>(S) | 0,1 | ≤ 1<br>(S) | ≤ 0,25/<br>4,75<br>(S) |
| 4           | cattle         | <i>M. chitae</i>     | 4<br>(S)                                              | 4/2<br>(S)   | 8<br>(S)  | ≤ 4<br>(S) | ≤ 4<br>(S) | ≤ 0,12<br>(S) | > 16<br>(5 <sup>th</sup> day)<br>(R)                  | ≤ 0,12<br>(S) | ≤ 2<br>(S)  | 2<br>(S)   | ≤ 1<br>(S) | ≤ 0,25<br>(S) | 0,5 | ≤ 1<br>(S) | ≤ 0,25/<br>4,75<br>(S) |
| 5           | cattle         | <i>M. chitae</i>     | ≤ 1<br>(S)                                            | 32/16<br>(R) | 4<br>(S)  | 8<br>(S)   | ≤ 4<br>(S) | ≤ 0,12<br>(S) | 4/4<br>(I/I)                                          | ≤ 0,12<br>(S) | 16<br>(I)   | ≤ 1<br>(S) | ≤ 1<br>(S) | ≤ 0,25<br>(S) | 0,5 | ≤ 1<br>(S) | ≤ 0,25/<br>4,75<br>(S) |
| 6           | cattle         | <i>M. chitae</i>     | ≤ 1<br>(S)                                            | 64/32<br>(R) | 4<br>(S)  | ≤ 4<br>(S) | ≤ 4<br>(S) | ≤ 0,12<br>(S) | 4/16<br>(I/R)                                         | ≤ 0,12<br>(S) | 4<br>(S)    | ≤ 1<br>(S) | ≤ 1<br>(S) | ≤ 0,25<br>(S) | 0,3 | ≤ 1<br>(S) | ≤ 0,25/<br>4,75<br>(S) |
| No. in list | Animal species | NTM species          | Interpretation of susceptibility test and MIC (µg/ml) |              |           |            |            |               |                                                       |               |             |            |            |               |     |            |                        |
|             |                |                      | AMI                                                   | AUG2         | FEP       | FOX        | AXO        | CIP           | CLA<br>(5 <sup>th</sup> day/<br>14 <sup>th</sup> day) | DOX           | IMI         | LZD        | MIN        | MXF           | TGC | TOB        | SXT                    |
| 7           | roe deer       | <i>M. chitae</i>     | ≤ 1<br>(S)                                            | ≤ 2/1<br>(S) | 4<br>(S)  | 8<br>(S)   | ≤ 4<br>(S) | ≤ 0,12<br>(S) | 0,25/<br>0,25<br>(S/S)                                | ≤ 0,12<br>(S) | ≤ 2<br>(S)  | ≤ 1<br>(S) | ≤ 1<br>(S) | ≤ 0,25<br>(S) | 0,5 | ≤ 1<br>(S) | ≤ 0,25/<br>4,75<br>(S) |
| 8           | roe deer       | <i>M. chitae</i>     | ≤ 1<br>(S)                                            | 4/2<br>(S)   | 32<br>(R) | ≤ 4<br>(S) | 8<br>(S)   | ≤ 0,12<br>(S) | ≤ 0,06/<br>≤ 0,06<br>(S/S)                            | ≤ 0,12<br>(S) | 4<br>(S)    | ≤ 1<br>(S) | ≤ 1<br>(S) | ≤ 0,25<br>(S) | 0,3 | ≤ 1<br>(S) | ≤ 0,25/<br>4,75<br>(S) |
| 9           | cattle         | <i>M. elephantis</i> | ≤ 1<br>(S)                                            | 16/8<br>(I)  | 8<br>(S)  | ≤ 4<br>(S) | ≤ 4<br>(S) | 0,25<br>(S)   | 1/1<br>(S/S)                                          | 0,25<br>(S)   | > 64<br>(R) | ≤ 1<br>(S) | ≤ 1<br>(S) | ≤ 0,25<br>(S) | 0,3 | 4<br>(I)   | ≤ 0,25/<br>4,75<br>(S) |
| 10          | cattle         | <i>M. fortuitum</i>  | ≤ 1                                                   | 16/8         | > 32      | 32         | > 64       | 2             | 0,25/1                                                | 4             | NR          | 8          | 2          | 1             | 2   | ≤ 1        | 2/38                   |

| No. in list | Animal species | NTM species         | Interpretation of susceptibility test and MIC (µg/ml) |              |             |            |             |               |                                                       |               |            |            |            |               |     |             |                        |
|-------------|----------------|---------------------|-------------------------------------------------------|--------------|-------------|------------|-------------|---------------|-------------------------------------------------------|---------------|------------|------------|------------|---------------|-----|-------------|------------------------|
|             |                |                     | AMI                                                   | AUG2         | FEP         | FOX        | AXO         | CIP           | CLA<br>(5 <sup>th</sup> day/<br>14 <sup>th</sup> day) | DOX           | IMI        | LZD        | MIN        | MXF           | TGC | TOB         | SXT                    |
|             |                |                     | (S)                                                   | (I)          | (R)         | (I)        | (R)         | (I)           | (S/S)                                                 | (I)           |            | (S)        | (I)        | (S)           |     | (S)         | (S)                    |
| 11          | cattle         | <i>M. fortuitum</i> | 8<br>(S)                                              | 64/32<br>(R) | 32<br>(R)   | 32<br>(I)  | 8<br>(S)    | 2<br>(I)      | ≤ 0,06/<br>0,25<br>(S/S)                              | 4<br>(I)      | NR         | 4<br>(S)   | 4<br>(I)   | 1<br>(S)      | 2   | 4<br>(I)    | 1/19<br>(S)            |
| 12          | cattle         | <i>M. fortuitum</i> | ≤ 1<br>(S)                                            | 16/8<br>(I)  | > 32<br>(R) | 64<br>(I)  | > 64<br>(R) | 0,25<br>(S)   | > 16<br>(5 <sup>th</sup> day)<br>(R)                  | ≤ 0,12<br>(S) | 8<br>(I)   | 2<br>(S)   | ≤ 1<br>(S) | ≤ 0,25<br>(S) | 0,1 | ≤ 1<br>(S)  | ≤ 0,25/<br>4,75<br>(S) |
| 13          | cattle         | <i>M. fortuitum</i> | ≤ 1<br>(S)                                            | 32/16<br>(R) | > 32<br>(R) | 128<br>(R) | > 64<br>(R) | 0,25<br>(S)   | > 16<br>(5 <sup>th</sup> day)<br>(R)                  | ≤ 0,12<br>(S) | ≤ 2<br>(S) | 2<br>(S)   | ≤ 1<br>(S) | ≤ 0,25<br>(S) | 0,3 | ≤ 1<br>(S)  | ≤ 0,25/<br>4,75<br>(S) |
| 14          | cattle         | <i>M. fortuitum</i> | 2<br>(S)                                              | 8/4<br>(S)   | 8<br>(S)    | ≤ 4<br>(S) | 8<br>(S)    | ≤ 0,12<br>(S) | 0,12/<br>0,12<br>(S/S)                                | 0,5<br>(S)    | ≤ 2<br>(S) | 4<br>(S)   | ≤ 1<br>(S) | ≤ 0,25<br>(S) | 0,5 | ≤ 1<br>(S)  | ≤ 0,25/<br>4,75<br>(S) |
| No. in list | Animal species | NTM species         | Interpretation of susceptibility test and MIC (µg/ml) |              |             |            |             |               |                                                       |               |            |            |            |               |     |             |                        |
|             |                |                     | AMI                                                   | AUG2         | FEP         | FOX        | AXO         | CIP           | CLA<br>(5 <sup>th</sup> day/<br>14 <sup>th</sup> day) | DOX           | IMI        | LZD        | MIN        | MXF           | TGC | TOB         | SXT                    |
| 15          | domestic pig   | <i>M. fortuitum</i> | 2<br>(S)                                              | 64/32<br>(R) | > 32<br>(R) | 64<br>(I)  | > 64<br>(R) | 2<br>(I)      | 4/16<br>(I/R)                                         | > 16<br>(R)   | NR         | 16<br>(I)  | > 8<br>(R) | 1<br>(S)      | 2   | > 16<br>(R) | 2/38<br>(S)            |
| 16          | wild boar      | <i>M. fortuitum</i> | 2<br>(S)                                              | 32/16<br>(R) | > 32<br>(R) | ≤ 4<br>(S) | 64<br>(R)   | ≤ 0,12<br>(S) | 4/8<br>(I/R)                                          | 2<br>(I)      | 8<br>(I)   | 2<br>(S)   | ≤ 1<br>(S) | ≤ 0,25<br>(S) | 0,3 | 2<br>(S)    | ≤ 0,25/<br>4,75<br>(S) |
| 17          | wild boar      | <i>M. fortuitum</i> | ≤ 1<br>(S)                                            | 32/16<br>(R) | 16<br>(I)   | 8<br>(S)   | 32<br>(I)   | ≤ 0,12<br>(S) | 4/4<br>(I/I)                                          | 0,5<br>(S)    | 8<br>(I)   | ≤ 1<br>(S) | ≤ 1<br>(S) | ≤ 0,25<br>(S) | 0,1 | ≤ 1<br>(S)  | ≤ 0,25/<br>4,75<br>(S) |
| 18          | wild boar      | <i>M. fortuitum</i> | ≤ 1<br>(S)                                            | 8/4<br>(S)   | 16<br>(I)   | 16<br>(S)  | 64<br>(R)   | ≤ 0,12<br>(S) | 4/>16<br>(I/R)                                        | 8<br>(R)      | 4<br>(S)   | 4<br>(S)   | 4<br>(I)   | ≤ 0,25<br>(S) | 0,1 | 8<br>(R)    | 0,5/9,5<br>(S)         |
| 19          | wild boar      | <i>M. fortuitum</i> | 2<br>(S)                                              | 32/16<br>(R) | > 32<br>(R) | 16<br>(S)  | > 64<br>(R) | ≤ 0,12<br>(S) | 8/8<br>(R/R)                                          | 4<br>(I)      | 8<br>(I)   | 2<br>(S)   | 2<br>(I)   | ≤ 0,25<br>(S) | 0,3 | 8<br>(R)    | 0,5/9,5<br>(S)         |
| 20          | wild boar      | <i>M. fortuitum</i> | ≤ 1<br>(S)                                            | 16/8<br>(I)  | > 32<br>(R) | 64<br>(I)  | > 64<br>(R) | 0,5<br>(S)    | > 16<br>(5 <sup>th</sup> day)<br>(R)                  | 0,5<br>(S)    | 8<br>(I)   | 4<br>(S)   | ≤ 1<br>(S) | ≤ 0,25<br>(S) | 0,1 | ≤ 1<br>(S)  | ≤ 0,25/<br>4,75<br>(S) |
| 21          | wild boar      | <i>M. fortuitum</i> | ≤ 1<br>(S)                                            | 32/16<br>(R) | > 32<br>(R) | ≤ 4<br>(S) | > 64<br>(R) | ≤ 0,12<br>(S) | ≤ 0,06/1<br>(S/S)                                     | 2<br>(I)      | ≤ 2<br>(S) | ≤ 1<br>(S) | 2<br>(I)   | ≤ 0,25<br>(S) | 0,3 | ≤ 1<br>(S)  | ≤ 0,25/<br>4,75<br>(S) |
| 22          | roe deer       | <i>M. fortuitum</i> | ≤ 1<br>(S)                                            | 32/16<br>(R) | > 32<br>(R) | ≤ 4<br>(S) | > 64<br>(R) | ≤ 0,12<br>(S) | 0,5/<br>0,5<br>(S/S)                                  | ≤ 0,12<br>(S) | ≤ 2<br>(S) | ≤ 1<br>(S) | ≤ 1<br>(S) | ≤ 0,25<br>(S) | 0,3 | 2<br>(S)    | ≤ 0,25/<br>4,75<br>(S) |
| No. in list | Animal species | NTM species         | Interpretation of susceptibility test and MIC (µg/ml) |              |             |            |             |               |                                                       |               |            |            |            |               |     |             |                        |
|             |                |                     | AMI                                                   | AUG2         | FEP         | FOX        | AXO         | CIP           | CLA<br>(5 <sup>th</sup> day/<br>14 <sup>th</sup> day) | DOX           | IMI        | LZD        | MIN        | MXF           | TGC | TOB         | SXT                    |
| 23          | roe deer       | <i>M. fortuitum</i> | ≤ 1<br>(S)                                            | 8/4<br>(S)   | 32<br>(R)   | ≤ 4<br>(S) | 32<br>(I)   | ≤ 0,12<br>(S) | 0,25/<br>0,5<br>(S/S)                                 | ≤ 0,12<br>(S) | 8<br>(I)   | ≤ 1<br>(S) | ≤ 1<br>(S) | ≤ 0,25<br>(S) | 0,1 | ≤ 1<br>(S)  | ≤ 0,25/<br>4,75<br>(S) |
| 24          | roe deer       | <i>M. fortuitum</i> | 2<br>(S)                                              | 16/8<br>(I)  | 8<br>(S)    | ≤ 4<br>(S) | ≤ 4<br>(S)  | ≤ 0,12<br>(S) | 0,12/<br>0,12<br>(S/S)                                | ≤ 0,12<br>(S) | ≤ 2<br>(S) | ≤ 1<br>(S) | 2<br>(I)   | ≤ 0,25<br>(S) | 0,1 | 2<br>(S)    | ≤ 0,25/<br>4,75<br>(S) |
| 25          | roe deer       | <i>M. fortuitum</i> | ≤ 1<br>(S)                                            | 32/16<br>(R) | 32<br>(R)   | ≤ 4<br>(S) | > 64<br>(R) | ≤ 0,12<br>(S) | 0,12/<br>0,12<br>(S/S)                                | 4<br>(I)      | ≤ 2<br>(S) | 2<br>(S)   | 2<br>(I)   | ≤ 0,25<br>(S) | 0,1 | 2<br>(S)    | ≤ 0,25/<br>4,75<br>(S) |
| 26          | roe deer       | <i>M. fortuitum</i> | ≤ 1<br>(S)                                            | 32/16<br>(R) | > 32<br>(R) | 8<br>(S)   | > 64<br>(R) | 0,5<br>(S)    | ≤ 0,06/<br>2<br>(S/S)                                 | 0,25<br>(S)   | NR         | ≤ 1<br>(S) | ≤ 1<br>(S) | ≤ 0,25<br>(S) | 0,5 | 2<br>(S)    | ≤ 0,25/<br>4,75<br>(S) |
| 27          | roe deer       | <i>M. fortuitum</i> | ≤ 1<br>(S)                                            | 32/16<br>(R) | 16<br>(I)   | ≤ 4<br>(S) | > 64<br>(R) | ≤ 0,12<br>(S) | ≤ 0,06/<br>≤ 0,06<br>(S/S)                            | 2<br>(I)      | ≤ 2<br>(S) | ≤ 1<br>(S) | ≤ 1<br>(S) | ≤ 0,25<br>(S) | 0   | 2<br>(S)    | ≤ 0,25/<br>4,75<br>(S) |
| 28          | roe deer       | <i>M. fortuitum</i> | ≤ 1<br>(S)                                            | 16/8<br>(I)  | > 32<br>(R) | 4<br>(S)   | > 64<br>(R) | ≤ 0,12<br>(S) | 0,5/<br>0,5                                           | 4<br>(I)      | ≤ 2<br>(S) | 2<br>(S)   | 4<br>(I)   | ≤ 0,25<br>(S) | 0,1 | 2<br>(S)    | 1/19<br>(S)            |

| No. in list | Animal species | NTM species         | Interpretation of susceptibility test and MIC (µg/ml) |               |             |            |             |               |                                                                |               |            |            |            |               |     |             |                        |
|-------------|----------------|---------------------|-------------------------------------------------------|---------------|-------------|------------|-------------|---------------|----------------------------------------------------------------|---------------|------------|------------|------------|---------------|-----|-------------|------------------------|
|             |                |                     | AMI                                                   | AUG2          | FEP         | FOX        | AXO         | CIP           | CLA<br>(5 <sup>th</sup> day/<br>14 <sup>th</sup> day)<br>(S/S) | DOX           | IMI        | LZD        | MIN        | MXF           | TGC | TOB         | SXT                    |
| 29          | roe deer       | <i>M. fortuitum</i> | ≤ 1<br>(S)                                            | 16/8<br>(I)   | > 32<br>(R) | ≤ 4<br>(S) | > 64<br>(R) | ≤ 0,12<br>(S) | 4/4<br>(I/I)                                                   | 2<br>(I)      | ≤ 2<br>(S) | ≤ 1<br>(S) | ≤ 1<br>(S) | ≤ 0,25<br>(S) | 0,5 | ≤ 1<br>(S)  | ≤ 0,25/<br>4,75<br>(S) |
| No. in list | Animal species | NTM species         | Interpretation of susceptibility test and MIC (µg/ml) |               |             |            |             |               |                                                                |               |            |            |            |               |     |             |                        |
|             |                |                     | AMI                                                   | AUG2          | FEP         | FOX        | AXO         | CIP           | CLA<br>(5 <sup>th</sup> day/<br>14 <sup>th</sup> day)<br>(S/S) | DOX           | IMI        | LZD        | MIN        | MXF           | TGC | TOB         | SXT                    |
| 30          | roe deer       | <i>M. fortuitum</i> | ≤ 1<br>(S)                                            | 64/32<br>(R)  | > 32<br>(R) | 8<br>(S)   | > 64<br>(R) | ≤ 0,12<br>(S) | ≤ 0,06/<br>≤ 0,06<br>(S/S)                                     | 4<br>(I)      | ≤ 2<br>(S) | 4<br>(S)   | 2<br>(I)   | ≤ 0,25<br>(S) | 0,1 | 2<br>(S)    | 0,5/9,5<br>(S)         |
| 31          | roe deer       | <i>M. fortuitum</i> | ≤ 1<br>(S)                                            | 32/16<br>(R)  | > 32<br>(R) | 32<br>(I)  | 64<br>(R)   | ≤ 0,12<br>(S) | 4/<br>> 16<br>(I/R)                                            | 16<br>(R)     | NR         | 4<br>(S)   | 8<br>(R)   | ≤ 0,25<br>(S) | 0,5 | ≤ 1<br>(S)  | 0,5/9,5<br>(S)         |
| 32          | roe deer       | <i>M. fortuitum</i> | ≤ 1<br>(S)                                            | 32/16<br>(R)  | > 32<br>(R) | 8<br>(S)   | > 64<br>(R) | ≤ 0,12<br>(S) | ≤ 0,06/<br>≤ 0,06<br>(S/S)                                     | 8<br>(R)      | 4<br>(S)   | 2<br>(S)   | 4<br>(I)   | ≤ 0,25<br>(S) | 0,1 | 2<br>(S)    | ≤ 0,25/<br>4,75<br>(S) |
| 33          | roe deer       | <i>M. fortuitum</i> | ≤ 1<br>(S)                                            | >64/32<br>(R) | > 32<br>(R) | 16<br>(S)  | > 64<br>(R) | ≤ 0,12<br>(S) | ≤ 0,06/<br>0,25<br>(S/S)                                       | 4<br>(I)      | 8<br>(I)   | 2<br>(S)   | ≤ 1<br>(S) | ≤ 0,25<br>(S) | 0,1 | 16<br>(R)   | 0,5/9,5<br>(S)         |
| 34          | roe deer       | <i>M. fortuitum</i> | 2<br>(S)                                              | 64/32<br>(R)  | > 32<br>(R) | 16<br>(S)  | > 64<br>(R) | ≤ 0,12<br>(S) | 2/8<br>(S/R)                                                   | 4<br>(I)      | 4<br>(S)   | ≤ 1<br>(S) | 2<br>(I)   | ≤ 0,25<br>(S) | 0,3 | > 16<br>(R) | 0,5/9,5<br>(S)         |
| 35          | roe deer       | <i>M. fortuitum</i> | ≤ 1<br>(S)                                            | 32/16<br>(R)  | > 32<br>(R) | 8<br>(S)   | > 64<br>(R) | ≤ 0,12<br>(S) | ≤ 0,06/<br>≤ 0,06<br>(S/S)                                     | 4<br>(I)      | 4<br>(S)   | 2<br>(S)   | 1<br>(S)   | ≤ 0,25<br>(S) | 0,1 | 2<br>(S)    | 0,5/9,5<br>(S)         |
| 36          | roe deer       | <i>M. fortuitum</i> | ≤ 1<br>(S)                                            | 32/16<br>(R)  | 16<br>(I)   | 32<br>(I)  | > 64<br>(R) | ≤ 0,12<br>(S) | 8/<br>> 16<br>(R/R)                                            | 16<br>(R)     | NR         | 8<br>(S)   | 8<br>(R)   | ≤ 0,25<br>(S) | 0,1 | 16<br>(R)   | 0,5/9,5<br>(S)         |
| 37          | sheep          | <i>M. neoaurum</i>  | ≤ 1<br>(S)                                            | ≤ 2/1<br>(S)  | > 32<br>(R) | 8<br>(S)   | 32<br>(I)   | ≤ 0,12<br>(S) | 0,12/<br>0,12<br>(S/S)                                         | ≤ 0,12<br>(S) | ≤ 2<br>(S) | ≤ 1<br>(S) | ≤ 1<br>(S) | ≤ 0,25<br>(S) | 0,1 | ≤ 1<br>(S)  | 0,5/9,5<br>(S)         |
| No. in list | Animal species | NTM species         | Interpretation of susceptibility test and MIC (µg/ml) |               |             |            |             |               |                                                                |               |            |            |            |               |     |             |                        |
|             |                |                     | AMI                                                   | AUG2          | FEP         | FOX        | AXO         | CIP           | CLA<br>(5 <sup>th</sup> day/<br>14 <sup>th</sup> day)<br>(S/S) | DOX           | IMI        | LZD        | MIN        | MXF           | TGC | TOB         | SXT                    |
| 38          | chicken        | <i>M. neoaurum</i>  | ≤ 1<br>(S)                                            | ≤ 2/1<br>(S)  | 16<br>(I)   | 8<br>(S)   | 16<br>(I)   | ≤ 0,12<br>(S) | ≤ 0,06/<br>≤ 0,06<br>(S/S)                                     | ≤ 0,12<br>(S) | ≤ 2<br>(S) | ≤ 1<br>(S) | ≤ 1<br>(S) | ≤ 0,25<br>(S) | 0,1 | ≤ 1<br>(S)  | ≤ 0,25/<br>4,75<br>(S) |
| 39          | wild boar      | <i>M. neoaurum</i>  | ≤ 1<br>(S)                                            | 4/2<br>(S)    | > 32<br>(R) | 8<br>(S)   | 64<br>(R)   | ≤ 0,12<br>(S) | 0,25/<br>0,25<br>(S/S)                                         | ≤ 0,12<br>(S) | 4<br>(S)   | ≤ 1<br>(S) | ≤ 1<br>(S) | ≤ 0,25<br>(S) | 0,3 | ≤ 1<br>(S)  | ≤ 0,25/<br>4,75<br>(S) |
| 40          | wild boar      | <i>M. neoaurum</i>  | ≤ 1<br>(S)                                            | ≤ 2/1<br>(S)  | 16<br>(I)   | 8<br>(S)   | > 64<br>(R) | ≤ 0,12<br>(S) | 0,25/<br>0,25<br>(S/S)                                         | ≤ 0,12<br>(S) | 16<br>(I)  | ≤ 1<br>(S) | ≤ 1<br>(S) | ≤ 0,25<br>(S) | 0,3 | 2<br>(S)    | ≤ 0,25/<br>4,75<br>(S) |
| 41          | wild boar      | <i>M. neoaurum</i>  | ≤ 1<br>(S)                                            | ≤ 2/1<br>(S)  | 16<br>(I)   | ≤ 4<br>(S) | 32<br>(I)   | ≤ 0,12<br>(S) | 0,12/<br>0,12<br>(S/S)                                         | ≤ 0,12<br>(S) | 4<br>(S)   | ≤ 1<br>(S) | ≤ 1<br>(S) | ≤ 0,25<br>(S) | 0,1 | ≤ 1<br>(S)  | ≤ 0,25/<br>4,75<br>(S) |
| 42          | roe deer       | <i>M. neoaurum</i>  | ≤ 1<br>(S)                                            | ≤ 2/1<br>(S)  | 32<br>(R)   | ≤ 4<br>(S) | 8<br>(S)    | ≤ 0,12<br>(S) | 0,25/<br>0,25<br>(S/S)                                         | ≤ 0,12<br>(S) | ≤ 2<br>(S) | ≤ 1<br>(S) | ≤ 1<br>(S) | ≤ 0,25<br>(S) | 0,3 | ≤ 1<br>(S)  | ≤ 0,25/<br>4,75<br>(S) |
| 43          | roe deer       | <i>M. neoaurum</i>  | ≤ 1<br>(S)                                            | 4/2<br>(S)    | > 32<br>(R) | 8<br>(S)   | 64<br>(R)   | ≤ 0,12<br>(S) | 0,12/<br>0,12<br>(S/S)                                         | ≤ 0,12<br>(S) | ≤ 2<br>(S) | ≤ 1<br>(S) | ≤ 1<br>(S) | ≤ 0,25<br>(S) | 0,3 | ≤ 1<br>(S)  | ≤ 0,25/<br>4,75<br>(S) |
| 44          | roe deer       | <i>M. neoaurum</i>  | ≤ 1<br>(S)                                            | 4/2<br>(S)    | > 32<br>(R) | 8<br>(S)   | 32<br>(I)   | ≤ 0,12<br>(S) | 0,12/<br>0,12<br>(S/S)                                         | ≤ 0,12<br>(S) | 8<br>(I)   | ≤ 1<br>(S) | ≤ 1<br>(S) | ≤ 0,25<br>(S) | 0,3 | ≤ 1<br>(S)  | ≤ 0,25/<br>4,75<br>(S) |
| No. in list | Animal species | NTM species         | Interpretation of susceptibility test and MIC (µg/ml) |               |             |            |             |               |                                                                |               |            |            |            |               |     |             |                        |
|             |                |                     | AMI                                                   | AUG2          | FEP         | FOX        | AXO         | CIP           | CLA<br>(5 <sup>th</sup> day/<br>14 <sup>th</sup> day)<br>(S/S) | DOX           | IMI        | LZD        | MIN        | MXF           | TGC | TOB         | SXT                    |

| No. in list | Animal species | NTM species        | Interpretation of susceptibility test and MIC (µg/ml) |              |             |             |             |               |                                                       |               |            |             |            |               |     |            |                        |
|-------------|----------------|--------------------|-------------------------------------------------------|--------------|-------------|-------------|-------------|---------------|-------------------------------------------------------|---------------|------------|-------------|------------|---------------|-----|------------|------------------------|
|             |                |                    | AMI                                                   | AUG2         | FEP         | FOX         | AXO         | CIP           | CLA<br>(5 <sup>th</sup> day/<br>14 <sup>th</sup> day) | DOX           | IMI        | LZD         | MIN        | MXF           | TGC | TOB        | SXT                    |
|             |                |                    |                                                       |              |             |             |             |               | 14 <sup>th</sup> day)                                 |               |            |             |            |               |     |            |                        |
| 45          | roe deer       | <i>M. neoaurum</i> | ≤ 1<br>(S)                                            | 4/2<br>(S)   | 32<br>(R)   | 8<br>(S)    | 64<br>(R)   | ≤ 0,12<br>(S) | 0,25/<br>0,25<br>(S/S)                                | ≤ 0,12<br>(S) | 16<br>(I)  | ≤ 1<br>(S)  | ≤ 1<br>(S) | ≤ 0,25<br>(S) | 0,3 | ≤ 1<br>(S) | ≤ 0,25/<br>4,75<br>(S) |
| 46          | roe deer       | <i>M. neoaurum</i> | ≤ 1<br>(S)                                            | 4/2<br>(S)   | > 32<br>(R) | 8<br>(S)    | 32<br>(I)   | ≤ 0,12<br>(S) | 0,25/<br>0,25<br>(S/S)                                | ≤ 0,12<br>(S) | 4<br>(S)   | ≤ 1<br>(S)  | ≤ 1<br>(S) | ≤ 0,25<br>(S) | 0,1 | ≤ 1<br>(S) | ≤ 0,25/<br>4,75<br>(S) |
| 47          | roe deer       | <i>M. neoaurum</i> | ≤ 1<br>(S)                                            | 8/4<br>(S)   | > 32<br>(R) | 8<br>(S)    | 64<br>(R)   | ≤ 0,12<br>(S) | 0,25/<br>0,25<br>(S/S)                                | ≤ 0,12<br>(S) | 4<br>(S)   | ≤ 1<br>(S)  | ≤ 1<br>(S) | ≤ 0,25<br>(S) | 0,3 | ≤ 1<br>(S) | ≤ 0,25/<br>4,75<br>(S) |
| 48          | roe deer       | <i>M. neoaurum</i> | ≤ 1<br>(S)                                            | ≤ 2/1<br>(S) | 4<br>(S)    | ≤ 4<br>(S)  | ≤ 4<br>(S)  | ≤ 0,12<br>(S) | ≤ 0,06/<br>≤ 0,06<br>(S/S)                            | ≤ 0,12<br>(S) | ≤ 2<br>(S) | ≤ 1<br>(S)  | ≤ 1<br>(S) | ≤ 0,25<br>(S) | 0,1 | ≤ 1<br>(S) | ≤ 0,25/<br>4,75<br>(S) |
| 49          | roe deer       | <i>M. neoaurum</i> | ≤ 1<br>(S)                                            | ≤ 2/1<br>(S) | 32<br>(R)   | ≤ 4<br>(S)  | 32<br>(I)   | ≤ 0,12<br>(S) | 0,12/<br>0,12<br>(S/S)                                | ≤ 0,12<br>(S) | ≤ 2<br>(S) | ≤ 1<br>(S)  | ≤ 1<br>(S) | ≤ 0,25<br>(S) | 0,3 | ≤ 1<br>(S) | ≤ 0,25/<br>4,75<br>(S) |
| 50          | roe deer       | <i>M. neoaurum</i> | ≤ 1<br>(S)                                            | ≤ 2/1<br>(S) | > 32<br>(R) | 8<br>(S)    | 32<br>(I)   | ≤ 0,12<br>(S) | ≤ 0,06/<br>≤ 0,06<br>(S/S)                            | ≤ 0,12<br>(S) | ≤ 2<br>(S) | ≤ 1<br>(S)  | ≤ 1<br>(S) | ≤ 0,25<br>(S) | 0,1 | ≤ 1<br>(S) | ≤ 0,25/<br>4,75<br>(S) |
| 51          | roe deer       | <i>M. neoaurum</i> | ≤ 1<br>(S)                                            | ≤ 2/1<br>(S) | 16<br>(I)   | 8<br>(S)    | 16<br>(I)   | ≤ 0,12<br>(S) | ≤ 0,06/<br>0,12<br>(S/S)                              | ≤ 0,12<br>(S) | ≤ 2<br>(S) | ≤ 1<br>(S)  | ≤ 1<br>(S) | ≤ 0,25<br>(S) | 0,1 | ≤ 1<br>(S) | ≤ 0,25/<br>4,75<br>(S) |
| No. in list | Animal species | NTM species        | Interpretation of susceptibility test and MIC (µg/ml) |              |             |             |             |               |                                                       |               |            |             |            |               |     |            |                        |
|             |                |                    | AMI                                                   | AUG2         | FEP         | FOX         | AXO         | CIP           | CLA<br>(5 <sup>th</sup> day/<br>14 <sup>th</sup> day) | DOX           | IMI        | LZD         | MIN        | MXF           | TGC | TOB        | SXT                    |
|             |                |                    |                                                       |              |             |             |             |               | 14 <sup>th</sup> day)                                 |               |            |             |            |               |     |            |                        |
| 52          | roe deer       | <i>M. neoaurum</i> | ≤ 1<br>(S)                                            | ≤ 2/1<br>(S) | > 32<br>(R) | ≤ 4<br>(S)  | 32<br>(I)   | ≤ 0,12<br>(S) | 0,12/<br>0,25<br>(S/S)                                | ≤ 0,12<br>(S) | ≤ 2<br>(S) | 4<br>(S)    | ≤ 1<br>(S) | ≤ 0,25<br>(S) | 0,1 | 8<br>(R)   | ≤ 0,25/<br>4,75<br>(S) |
| 53          | roe deer       | <i>M. neoaurum</i> | ≤ 1<br>(S)                                            | ≤ 2/1<br>(S) | > 32<br>(R) | 8<br>(S)    | 32<br>(I)   | ≤ 0,12<br>(S) | 0,12/<br>0,12<br>(S/S)                                | ≤ 0,12<br>(S) | ≤ 2<br>(S) | ≤ 1<br>(S)  | ≤ 1<br>(S) | ≤ 0,25<br>(S) | 0,1 | ≤ 1<br>(S) | ≤ 0,25/<br>4,75<br>(S) |
| 54          | roe deer       | <i>M. neoaurum</i> | ≤ 1<br>(S)                                            | ≤ 2/1<br>(S) | 16<br>(I)   | ≤ 4<br>(S)  | 8<br>(S)    | ≤ 0,12<br>(S) | 0,12/<br>0,12<br>(S/S)                                | ≤ 0,12<br>(S) | ≤ 2<br>(S) | ≤ 1<br>(S)  | ≤ 1<br>(S) | ≤ 0,25<br>(S) | 0,1 | ≤ 1<br>(S) | ≤ 0,25/<br>4,75<br>(S) |
| 55          | roe deer       | <i>M. neoaurum</i> | ≤ 1<br>(S)                                            | ≤ 2/1<br>(S) | 32<br>(R)   | 8<br>(S)    | 16<br>(I)   | ≤ 0,12<br>(S) | 0,25/<br>0,25<br>(S/S)                                | ≤ 0,12<br>(S) | 8<br>(I)   | ≤ 1<br>(S)  | ≤ 1<br>(S) | ≤ 0,25<br>(S) | 0,3 | ≤ 1<br>(S) | ≤ 0,25/<br>4,75<br>(S) |
| 56          | roe deer       | <i>M. neoaurum</i> | ≤ 1<br>(S)                                            | ≤ 2/1<br>(S) | ≤ 1<br>(S)  | 8<br>(S)    | ≤ 4<br>(S)  | ≤ 0,12<br>(S) | ≤ 0,06/<br>≤ 0,06<br>(S/S)                            | ≤ 0,12<br>(S) | ≤ 2<br>(S) | ≤ 1<br>(S)  | ≤ 1<br>(S) | ≤ 0,25<br>(S) | 0,3 | ≤ 1<br>(S) | 0,5/9,5<br>(S)         |
| 57          | roe deer       | <i>M. neoaurum</i> | ≤ 1<br>(S)                                            | 4/2<br>(S)   | > 32<br>(R) | ≤ 4<br>(S)  | 32<br>(I)   | ≤ 0,12<br>(S) | 0,12/<br>0,12<br>(S/S)                                | ≤ 0,12<br>(S) | 4<br>(S)   | ≤ 1<br>(S)  | ≤ 1<br>(S) | ≤ 0,25<br>(S) | 0,3 | ≤ 1<br>(S) | ≤ 0,25/<br>4,75<br>(S) |
| No. in list | Animal species | NTM species        | Interpretation of susceptibility test and MIC (µg/ml) |              |             |             |             |               |                                                       |               |            |             |            |               |     |            |                        |
|             |                |                    | AMI                                                   | AUG2         | FEP         | FOX         | AXO         | CIP           | CLA<br>(5 <sup>th</sup> day/<br>14 <sup>th</sup> day) | DOX           | IMI        | LZD         | MIN        | MXF           | TGC | TOB        | SXT                    |
|             |                |                    |                                                       |              |             |             |             |               | 14 <sup>th</sup> day)                                 |               |            |             |            |               |     |            |                        |
| 58          | roe deer       | <i>M. neoaurum</i> | ≤ 1<br>(S)                                            | 4/2<br>(S)   | 32<br>(R)   | 8<br>(S)    | 8<br>(S)    | ≤ 0,12<br>(S) | 0,12/<br>0,12<br>(S/S)                                | ≤ 0,12<br>(S) | ≤ 2<br>(S) | ≤ 1<br>(S)  | ≤ 1<br>(S) | ≤ 0,25<br>(S) | 0,1 | ≤ 1<br>(S) | ≤ 0,25/<br>4,75<br>(S) |
| 59          | roe deer       | <i>M. neoaurum</i> | ≤ 1<br>(S)                                            | ≤ 2/1<br>(S) | 32<br>(R)   | ≤ 4<br>(S)  | 16<br>(I)   | ≤ 0,12<br>(S) | 0,12/<br>0,12<br>(S/S)                                | ≤ 0,12<br>(S) | ≤ 2<br>(S) | ≤ 1<br>(S)  | ≤ 1<br>(S) | ≤ 0,25<br>(S) | 0,1 | ≤ 1<br>(S) | ≤ 0,25/<br>4,75<br>(S) |
| 60          | roe deer       | <i>M. neoaurum</i> | ≤ 1<br>(S)                                            | 64/32<br>(R) | 4<br>(S)    | >128<br>(R) | 32<br>(I)   | ≤ 0,12<br>(S) | 16/16<br>(R/R)                                        | 1<br>(S)      | ≤ 2<br>(S) | > 32<br>(R) | ≤ 1<br>(S) | ≤ 0,25<br>(S) | 0,5 | ≤ 1<br>(S) | 8/152<br>(R)           |
| 61          | roe deer       | <i>M. neoaurum</i> | 8<br>(S)                                              | ≤ 2/1<br>(S) | > 32<br>(R) | 128<br>(R)  | > 64<br>(R) | 0,5<br>(S)    | ≤ 0,06/<br>≤ 0,06<br>(S/S)                            | 0,25<br>(S)   | ≤ 2<br>(S) | 2<br>(S)    | ≤ 1<br>(S) | ≤ 0,25<br>(S) | 0   | 4<br>(I)   | ≤ 0,25/<br>4,75<br>(S) |

| No. in list | Animal species | NTM species          | Interpretation of susceptibility test and MIC (µg/ml) |               |             |            |             |               |                                                       |               |            |            |            |               |         |             |                        |
|-------------|----------------|----------------------|-------------------------------------------------------|---------------|-------------|------------|-------------|---------------|-------------------------------------------------------|---------------|------------|------------|------------|---------------|---------|-------------|------------------------|
|             |                |                      | AMI                                                   | AUG2          | FEP         | FOX        | AXO         | CIP           | CLA<br>(5 <sup>th</sup> day/<br>14 <sup>th</sup> day) | DOX           | IMI        | LZD        | MIN        | MXF           | TGC     | TOB         | SXT                    |
| 62          | roe deer       | <i>M. peregrinum</i> | ≤ 1<br>(S)                                            | >64/32<br>(R) | > 32<br>(R) | 16<br>(S)  | > 64<br>(R) | ≤ 0,12<br>(S) | (5 <sup>th</sup> day)<br>(S)                          | 4<br>(I)      | NR         | 4<br>(S)   | 4<br>(I)   | ≤ 0,25<br>(S) | 0,3     | 8<br>(R)    | 0,5/<br>9,5<br>(S)     |
| 63          | wild boar      | <i>M. phocaicum</i>  | ≤ 1<br>(S)                                            | 16/8<br>(I)   | 4<br>(S)    | 8<br>(S)   | ≤ 4<br>(S)  | ≤ 0,12<br>(S) | (5 <sup>th</sup> day)<br>(S)                          | 0,25<br>(S)   | NR         | ≤ 1<br>(S) | ≤ 1<br>(S) | ≤ 0,25<br>(S) | 0,1     | ≤ 1<br>(S)  | ≤ 0,25/<br>4,75<br>(S) |
| 64          | wild boar      | <i>M. phocaicum</i>  | ≤ 1<br>(S)                                            | 8/4<br>(S)    | 4<br>(S)    | 8<br>(S)   | ≤ 4<br>(S)  | ≤ 0,12<br>(S) | (5 <sup>th</sup> day)<br>(S)                          | 0,25<br>(S)   | NR         | ≤ 1<br>(S) | ≤ 1<br>(S) | ≤ 0,25<br>(S) | 0,5     | ≤ 1<br>(S)  | ≤ 0,25/<br>4,75<br>(S) |
| 65          | wild boar      | <i>M. phocaicum</i>  | ≤ 1<br>(S)                                            | 32/16<br>(R)  | 8<br>(S)    | ≤ 4<br>(S) | 16<br>(I)   | ≤ 0,12<br>(S) | (5 <sup>th</sup> day)<br>(S)                          | ≤ 0,12<br>(S) | NR         | 2<br>(S)   | 2<br>(I)   | ≤ 0,25<br>(S) | 0,3     | ≤ 1<br>(S)  | 0,5/<br>9,5<br>(S)     |
| No. in list | Animal species | NTM species          | Interpretation of susceptibility test and MIC (µg/ml) |               |             |            |             |               |                                                       |               |            |            |            |               |         |             |                        |
|             |                |                      | AMI                                                   | AUG2          | FEP         | FOX        | AXO         | CIP           | CLA<br>(5 <sup>th</sup> day/<br>14 <sup>th</sup> day) | DOX           | IMI        | LZD        | MIN        | MXF           | TGC     | TOB         | SXT                    |
| 66          | wild boar      | <i>M. phocaicum</i>  | ≤ 1<br>(S)                                            | 16/8<br>(I)   | 16<br>(I)   | 8<br>(S)   | ≤ 4<br>(S)  | ≤ 0,12<br>(S) | (5 <sup>th</sup> day)<br>(S)                          | 0,25<br>(S)   | NR         | ≤ 1<br>(S) | 2<br>(I)   | ≤ 0,25<br>(S) | 0,5     | ≤ 1<br>(S)  | 1/19<br>(S)            |
| 67          | wild boar      | <i>M. phocaicum</i>  | ≤ 1<br>(S)                                            | 32/16<br>(R)  | > 32<br>(R) | ≤ 4<br>(S) | > 64<br>(R) | ≤ 0,12<br>(S) | (5 <sup>th</sup> day)<br>(S)                          | ≤ 0,12<br>(S) | 4<br>(S)   | ≤ 1<br>(S) | ≤ 1<br>(S) | ≤ 0,25<br>(S) | ≤ 0,015 | ≤ 1<br>(S)  | 2/38<br>(S)            |
| 68          | wild boar      | <i>M. phocaicum</i>  | ≤ 1<br>(S)                                            | ≤ 2/1<br>(S)  | 8<br>(S)    | ≤ 4<br>(S) | ≤ 4<br>(S)  | ≤ 0,12<br>(S) | (5 <sup>th</sup> day)<br>(S)                          | ≤ 0,12<br>(S) | ≤ 2<br>(S) | ≤ 1<br>(S) | ≤ 1<br>(S) | ≤ 0,25<br>(S) | 0,1     | ≤ 1<br>(S)  | ≤ 0,25/<br>4,75<br>(S) |
| 69          | wild boar      | <i>M. phocaicum</i>  | ≤ 1<br>(S)                                            | ≤ 2/1<br>(S)  | 4<br>(S)    | 8<br>(S)   | 8<br>(S)    | 0,25<br>(S)   | (5 <sup>th</sup> day)<br>(S)                          | 4<br>(I)      | ≤ 2<br>(S) | 2<br>(S)   | 2<br>(I)   | ≤ 0,25<br>(S) | 1       | 8<br>(R)    | 0,5/<br>9,5<br>(S)     |
| 70          | wild boar      | <i>M. porcinum</i>   | ≤ 1<br>(S)                                            | 32/16<br>(R)  | > 32<br>(R) | 16<br>(S)  | > 64<br>(R) | ≤ 0,12<br>(S) | 8/16<br>(R/R)                                         | > 16<br>(R)   | 8<br>(I)   | 4<br>(S)   | > 8<br>(R) | ≤ 0,25<br>(S) | 0,3     | 16<br>(R)   | 0,5/<br>9,5<br>(S)     |
| 71          | wild boar      | <i>M. porcinum</i>   | ≤ 1<br>(S)                                            | 16/8<br>(I)   | 32<br>(R)   | 8<br>(S)   | > 64<br>(R) | ≤ 0,12<br>(S) | 8/8<br>(R/R)                                          | 16<br>(R)     | 4<br>(S)   | 2<br>(S)   | 4<br>(I)   | ≤ 0,25<br>(S) | 0,1     | 8<br>(R)    | 0,5/<br>9,5<br>(S)     |
| 72          | wild boar      | <i>M. pulveris</i>   | ≤ 1<br>(S)                                            | ≤ 2/1<br>(S)  | 8<br>(S)    | ≤ 4<br>(S) | 16<br>(I)   | ≤ 0,12<br>(S) | ≤ 0,06/<br>≤ 0,06<br>(S/S)                            | 0,25<br>(S)   | ≤ 2<br>(S) | 2<br>(S)   | ≤ 1<br>(S) | ≤ 0,25<br>(S) | 0,1     | ≤ 1<br>(S)  | ≤ 0,25/<br>4,75<br>(S) |
| 73          | roe deer       | <i>M. septicum</i>   | ≤ 1<br>(S)                                            | 4/2<br>(S)    | 4<br>(S)    | ≤ 4<br>(S) | 8<br>(S)    | ≤ 0,12<br>(S) | ≤ 0,06/<br>≤ 0,06<br>(S/S)                            | 2<br>(I)      | 8<br>(I)   | 2<br>(S)   | ≤ 1<br>(S) | ≤ 0,25<br>(S) | 0,1     | ≤ 1<br>(S)  | ≤ 0,25/<br>4,75<br>(S) |
| No. in list | Animal species | NTM species          | Interpretation of susceptibility test and MIC (µg/ml) |               |             |            |             |               |                                                       |               |            |            |            |               |         |             |                        |
|             |                |                      | AMI                                                   | AUG2          | FEP         | FOX        | AXO         | CIP           | CLA<br>(5 <sup>th</sup> day/<br>14 <sup>th</sup> day) | DOX           | IMI        | LZD        | MIN        | MXF           | TGC     | TOB         | SXT                    |
| 74          | cattle         | <i>M. vaccae</i>     | ≤ 1<br>(S)                                            | ≤ 2/1<br>(S)  | > 32<br>(R) | 8<br>(S)   | 32<br>(I)   | ≤ 0,12<br>(S) | 1/1<br>(S/S)                                          | ≤ 0,12<br>(S) | ≤ 2<br>(S) | ≤ 1<br>(S) | ≤ 1<br>(S) | ≤ 0,25<br>(S) | 0,1     | ≤ 1<br>(S)  | 0,5/<br>9,5<br>(S)     |
| 75          | cattle         | <i>M. vaccae</i>     | ≤ 1<br>(S)                                            | 16/8<br>(I)   | > 32<br>(R) | ≤ 4<br>(S) | > 64<br>(R) | ≤ 0,12<br>(S) | 0,25/<br>0,25<br>(S/S)                                | 0,5<br>(S)    | 16<br>(I)  | ≤ 1<br>(S) | ≤ 1<br>(S) | ≤ 0,25<br>(S) | 0,3     | 2<br>(S)    | 0,5/<br>9,5<br>(S)     |
| 76          | wild boar      | <i>M. vaccae</i>     | ≤ 1<br>(S)                                            | 8/4<br>(S)    | 32<br>(R)   | 16<br>(S)  | > 64<br>(R) | 1<br>(S)      | 1/2<br>(S/S)                                          | 4<br>(I)      | 4<br>(S)   | 4<br>(S)   | ≤ 1<br>(S) | 1<br>(S)      | 0,5     | 4<br>(I)    | 1/19<br>(S)            |
| 77          | wild boar      | <i>M. vaccae</i>     | ≤ 1<br>(S)                                            | 32/16<br>(R)  | > 32<br>(R) | 32<br>(I)  | > 64<br>(R) | ≤ 0,12<br>(S) | 2/16<br>(S/R)                                         | > 16<br>(R)   | 32<br>(R)  | 16<br>(I)  | > 8<br>(R) | ≤ 0,25<br>(S) | 0,5     | > 16<br>(R) | 2/38<br>(S)            |
| 78          | wild boar      | <i>M. vaccae</i>     | ≤ 1<br>(S)                                            | ≤ 2/1<br>(S)  | 4<br>(S)    | ≤ 4<br>(S) | 64<br>(R)   | ≤ 0,12<br>(S) | 0,12/<br>0,12<br>(S/S)                                | ≤ 0,12<br>(S) | 8<br>(I)   | ≤ 1<br>(S) | ≤ 1<br>(S) | ≤ 0,25<br>(S) | 0,3     | ≤ 1<br>(S)  | 2/38<br>(S)            |
| 79          | wild boar      | <i>M. vaccae</i>     | ≤ 1<br>(S)                                            | ≤ 2/1<br>(S)  | 8<br>(S)    | ≤ 4<br>(S) | 32<br>(I)   | ≤ 0,12<br>(S) | 0,12/<br>0,12<br>(S/S)                                | ≤ 0,12<br>(S) | 8<br>(I)   | ≤ 1<br>(S) | ≤ 1<br>(S) | ≤ 0,25<br>(S) | 0,1     | ≤ 1<br>(S)  | 1/19<br>(S)            |

| No. in list | Animal species   | NTM species                       | Interpretation of susceptibility test and MIC (µg/ml) |               |             |            |             |               |                                                       |               |             |            |            |               |     |            |                        |
|-------------|------------------|-----------------------------------|-------------------------------------------------------|---------------|-------------|------------|-------------|---------------|-------------------------------------------------------|---------------|-------------|------------|------------|---------------|-----|------------|------------------------|
|             |                  |                                   | AMI                                                   | AUG2          | FEP         | FOX        | AXO         | CIP           | CLA<br>(5 <sup>th</sup> day/<br>14 <sup>th</sup> day) | DOX           | IMI         | LZD        | MIN        | MXF           | TGC | TOB        | SXT                    |
| 80          | wild boar        | <i>M. vaccae</i>                  | ≤1<br>(S)                                             | >64/32<br>(R) | > 32<br>(R) | 64<br>(I)  | > 64<br>(R) | ≤ 0,12<br>(S) | 16/16<br>(R/R)                                        | 0,5<br>(S)    | > 64<br>(R) | ≤ 1<br>(S) | ≤ 1<br>(S) | ≤ 0,25<br>(S) | 0,1 | 8<br>(R)   | ≤ 0,25/<br>4,75<br>(S) |
| 81          | wild boar        | <i>M. vaccae</i>                  | 2<br>(S)                                              | ≤ 2/1<br>(S)  | 4<br>(S)    | 8<br>(S)   | 64<br>(R)   | ≤ 0,12<br>(S) | 16/16<br>(R/R)                                        | ≤ 0,12<br>(S) | 8<br>(I)    | ≤ 1<br>(S) | ≤ 1<br>(S) | ≤ 0,25<br>(S) | 0,3 | 4<br>(I)   | 0,5/<br>9,5<br>(S)     |
| No. in list | Animal species   | NTM species                       | Interpretation of susceptibility test and MIC (µg/ml) |               |             |            |             |               |                                                       |               |             |            |            |               |     |            |                        |
|             |                  |                                   | AMI                                                   | AUG2          | FEP         | FOX        | AXO         | CIP           | CLA<br>(5 <sup>th</sup> day/<br>14 <sup>th</sup> day) | DOX           | IMI         | LZD        | MIN        | MXF           | TGC | TOB        | SXT                    |
| 82          | wild boar        | <i>M. vaccae</i>                  | ≤1<br>(S)                                             | ≤ 2/1<br>(S)  | 4<br>(S)    | 8<br>(S)   | 64<br>(R)   | ≤ 0,12<br>(S) | > 16 (5 <sup>th</sup><br>day)<br>(R)                  | ≤ 0,12<br>(S) | 8<br>(I)    | ≤ 1<br>(S) | ≤ 1<br>(S) | ≤ 0,25<br>(S) | 0,3 | 2<br>(S)   | 2/38<br>(S)            |
| 83          | wild boar        | <i>M. vaccae</i>                  | ≤1<br>(S)                                             | 8/4<br>(S)    | ≤1<br>(S)   | ≤ 4<br>(S) | ≤ 4<br>(S)  | ≤ 0,12<br>(S) | ≤ 0,06/<br>≤ 0,06<br>(S/S)                            | 0,25<br>(S)   | 16<br>(I)   | ≤ 1<br>(S) | ≤ 1<br>(S) | 0,5<br>(S)    | 0,3 | ≤ 1<br>(S) | ≤ 0,25/<br>4,75<br>(S) |
| 84          | wild boar        | <i>M. vaccae</i>                  | ≤ 1<br>(S)                                            | ≤ 2/1<br>(S)  | 32<br>(R)   | ≤4<br>(S)  | 16<br>(I)   | ≤ 0,12<br>(S) | 0,12/<br>0,12<br>(S/S)                                | ≤ 0,12<br>(S) | ≤ 2<br>(S)  | ≤ 1<br>(S) | ≤ 1<br>(S) | ≤ 0,25<br>(S) | 0,1 | ≤ 1<br>(S) | ≤ 0,25/<br>4,75<br>(S) |
| 85          | wild boar        | <i>M. vaccae</i>                  | ≤ 1<br>(S)                                            | 16/8<br>(I)   | 4<br>(S)    | ≤4<br>(S)  | ≤4<br>(S)   | 4<br>(R)      | 0,5/<br>0,5<br>(S/S)                                  | 0,5<br>(S)    | 16<br>(I)   | 2<br>(S)   | ≤ 1<br>(S) | 1<br>(S)      | 0,1 | ≤ 1<br>(S) | 0,5/<br>9,5<br>(S)     |
| 86          | wild boar        | <i>M. vaccae</i>                  | ≤ 1<br>(S)                                            | 16/8<br>(I)   | 16<br>(I)   | ≤4<br>(S)  | 64<br>(R)   | ≤ 0,12<br>(S) | 2/16<br>(S/R)                                         | 8<br>(R)      | 4<br>(S)    | 4<br>(S)   | > 8<br>(R) | ≤ 0,25<br>(S) | 0,1 | 4<br>(I)   | 0,5/<br>9,5<br>(S)     |
| 87          | roe deer         | <i>M. vaccae</i>                  | 32<br>(I)                                             | ≤ 2/1<br>(S)  | > 32<br>(R) | 64<br>(I)  | > 64<br>(R) | 0,25<br>(S)   | ≤ 0,06/<br>≤ 0,06<br>(S/S)                            | 0,25<br>(S)   | ≤ 2<br>(S)  | 2<br>(S)   | ≤ 1<br>(S) | ≤ 0,25<br>(S) | 0,3 | 2<br>(S)   | ≤ 0,25/<br>4,75<br>(S) |
| No. in list | Animal species   | NTM species                       | Interpretation of susceptibility test and MIC (µg/ml) |               |             |            |             |               |                                                       |               |             |            |            |               |     |            |                        |
|             |                  |                                   | AMI                                                   | AUG2          | FEP         | FOX        | AXO         | CIP           | CLA<br>(5 <sup>th</sup> day/<br>14 <sup>th</sup> day) | DOX           | IMI         | LZD        | MIN        | MXF           | TGC | TOB        | SXT                    |
|             | Positive control | <i>M. smegmatis</i><br>ATCC 19420 | /                                                     | /             | /           | /          | /           | 0,5           | /                                                     | /             | /           | /          | /          | /             | /   | /          | /                      |

AMI, amikacin; ATCC, American Type Culture Collection; AUG2, amoxicillin/clavulanic acid, ratio 2:1; AXO, ceftriaxone; CIP, ciprofloxacin; CLA, clarithromycin; DOX, doxycycline; FEP, cefepime; FOX, cefoxitin; I, intermediate susceptible; IMI, imipenem; LZD, linezolid; MIC, minimum inhibitory concentration; MIN, minocycline; MXF, moxifloxacin; NR, not reported due to antibiotic instability; NTM, non-tuberculous mycobacteria; R, resistant; S, susceptible; SXT, trimethoprim – sulfamethoxazole; TGC, tigecycline; TOB, tobramycin.
